1 **Spread and control of COVID-19 in China and their associations with**  
2 **population movement, public health emergency measures, and**  
3 **medical resources**

4  
5 Songmin Ying, M.D., Ph.D., Fei Li, M.D., Xinwei Geng, Ph.D., Zhouyang Li, M.D., Xufei Du,  
6 M.D., Haixia Chen, M.D., Sisi Chen, M.D., Min Zhang, M.D., Zehua Shao, M.D., Yinfang Wu,  
7 M.D., Madiha Zahra Syeda, M.D., Fugui Yan, M.D., Ph.D., Luanqing Che, M.D., Ph.D., Bin Zhang,  
8 M.D., Jian Lou, M.D., Ph.D., Shaobin Wang, M.D., Zhengming Chen, Ph.D., Wen Li, M.D., Ph.D.,  
9 Ye Shen, M.S., Zhihua Chen, Ph.D., and Huahao Shen, M.D., Ph.D.

10

11 The authors' affiliations are listed in the Appendix. Address reprint requests to Drs. H Shen, S Ying,  
12 or Z Chen at Department of Respiratory and Critical Care Medicine, Second Affiliated Hospital of  
13 Zhejiang University School of Medicine, or at [huahaoshen@zju.edu.cn](mailto:huahaoshen@zju.edu.cn), [yings@zju.edu.cn](mailto:yings@zju.edu.cn), or  
14 [zhihuachen@zju.edu.cn](mailto:zhihuachen@zju.edu.cn), respectively; or to Y Shen at Hangzhou Mitigenomics Technology Inc., or  
15 at [Shen.jack@mitigenomics.com](mailto:Shen.jack@mitigenomics.com).

16

17 Drs. S. Ying, F. Li, X. Geng, Z. Li, X. Du, H. Chen, S. Chen, and M. Zhang contributed equally to  
18 this article.

19

20 **ABSTRACT**

21 **BACKGROUND** The COVID-19 epidemic, first emerged in Wuhan during December 2019, has  
22 spread globally. While the mass population movement for Chinese New Year has significantly  
23 influenced spreading the disease, little direct evidence exists about the relevance to epidemic and its  
24 control of population movement from Wuhan, local emergency response, and medical resources in  
25 China.

26 **METHODS** Spearman's correlation analysis was performed between official data of confirmed  
27 COVID-19 cases from Jan 20<sup>th</sup> to Feb 19<sup>th</sup>, 2020 and real-time travel data and health resources data.

28 **RESULTS** There were 74,675 confirmed COVID-19 cases in China by Feb 19<sup>th</sup>, 2020. The overall  
29 fatality rate was 2.84%, much higher in Hubei than in other regions (3.27% vs 0.73%). The index of  
30 population inflow from Hubei was positively correlated with total (Provincial  $r=0.9159$ ,  $p<0.001$ ;  
31 City  $r=0.6311$ ,  $p<0.001$ ) and primary cases (Provincial  $r=0.8702$ ,  $p<0.001$ ; City  $r=0.6358$ ,  $p<0.001$ ).  
32 The local health emergency measures (eg, city lockdown and traffic control) were associated with  
33 reduced infections nationwide. Moreover, the number of public health employees per capita was  
34 inversely correlated with total cases ( $r=-0.6295$ ,  $p<0.001$ ) and infection rates ( $r=-0.4912$ ,  $p<0.01$ ).  
35 Similarly, cities with less medical resources had higher fatality ( $r=-0.4791$ ,  $p<0.01$ ) and lower cure  
36 rates ( $r=0.5286$ ,  $p<0.01$ ) among the confirmed cases.

37 **CONCLUSIONS** The spread of the COVID-19 in China in its early phase was attributed primarily  
38 to population movement from Hubei, and effective governmental health emergency measures and  
39 adequate medical resources played important roles in subsequent control of epidemic and improved  
40 prognosis of affected individuals.

41

## 42 INTRODUCTION

43 In mid-December 2019, an unexplained mass of pneumonia cases occurred in Wuhan, Hubei province  
44 of China<sup>1</sup>. Early epidemiological investigations indicated that the cause of the infection could be  
45 linked to the Wuhan South China Seafood Market<sup>2</sup>. High-throughput sequencing revealed a novel  
46 beta-coronavirus that was provisionally called 2019 novel coronavirus (2019-nCoV)<sup>3,4</sup>, which has  
47 now been officially renamed to COVID-19 by WHO<sup>5,6</sup>. A number of studies showed that the  
48 epidemiological, clinical, laboratory, and radiological features of COVID-19 are similar, albeit less  
49 deadly, to those of severe acute respiratory syndrome coronavirus (SARS) in 2003 and Middle East  
50 respiratory syndrome (MERS) in 2012<sup>7-9</sup>, and evidences pointing to the human-to-human  
51 transmission in hospital and family settings have now been firmly established<sup>10</sup>.

52 Due to the Chinese Lunar New Year travel rush, the COVID-19 epidemic has gradually spread across  
53 the country and even worldwide within a limited time frame<sup>11</sup>. In response to the situation,  
54 unprecedented measures have been taken by central and local government to contain the outbreak  
55 and prevent its further spread across China. On Jan 23<sup>th</sup>, the Wuhan City Epidemic Prevention and  
56 Control Headquarters announced that all urban buses, subways, ferries, and long-distance passenger  
57 operations were suspended, and that the passages of airports and train stations were temporarily  
58 closed<sup>12</sup>. Subsequently, major cities within Hubei province started to implement lockdown on Jan 26<sup>th</sup>  
59 or 27<sup>th</sup>, 2020, except the remote Shennongjia Forestry District due to the very limited number of  
60 COVID-19 cases. Unfortunately, around five million people had already left Wuhan by then since the  
61 emergence of COVID-19<sup>13,14</sup>. As the situation continued to deteriorate throughout China, the WHO  
62 declared it as a global public health emergency on Jan 30<sup>th</sup> 2020<sup>15</sup>.

63 Several studies have already reported on the molecular, clinical and epidemiological features of  
64 COVID-19<sup>11,16-18</sup>. However, to date no study has quantified the role of population movement in the  
65 spread of epidemics across different parts of China, or assessed the effectiveness of local public health  
66 emergency response, and medical resources on control of epidemics and prognosis of the patients. To  
67 help fill the evidence gap, we presented detailed analysis of available data of reported cases from Jan  
68 20<sup>th</sup> to Feb 19<sup>th</sup>, 2020 in China, along with information related to population travel, public health  
69 emergency measures, and available medical resource from various regions of China. The main  
70 objectives of this study were to present a real-world paradigm of the importance of governmental  
71 health emergency strategies in subsequent control of epidemic and the local medical resources in

72 association with the prognosis of affected cases.

73

## 74 **METHODS**

### 75 **COLLECTION OF EPITHELIAL DATA**

76 The daily data of confirmed COVID-19 cases in various regions of China from Jan 10<sup>th</sup> to Feb 19<sup>th</sup>,  
77 2020, were obtained from National or Provincial Health Commission in China (NHC/PHC). Data of  
78 global COVID-19 cases were collected from WHO. It included the daily new and cumulative cases  
79 of confirmed patients, cured patients, and deaths. All cases included detailed epidemiological history  
80 and the dates at which incidents occurred. Provinces with small number of cases or heavily weighted  
81 with incomplete exposure history cases, such as Jiangxi province, were excluded.

82

### 83 **COLLECTION OF MEDICAL RESOURCES DATA**

84 Information on medical resources were extracted from the national and local Statistical Yearbooks in  
85 2019, which included data on number of hospitals, health workers, and hospital beds per 1,000  
86 population, health expenditure per capita, and local population size. After excluding those with  
87 incomplete data in the Statistical Yearbooks, 9 cities of Hubei Province and 20 cities from other 14  
88 provinces of China were finally included in this study (Table S1).

89

### 90 **POPULATION OUTFLOW/INFLOW INDEX**

91 Data on population movement were retrieved from the Chinese Lunar New Year Travel Information,  
92 which was released daily by Baidu Migration Map (<http://qianxi.baidu.com>). We obtained the daily  
93 outflow index in Hubei that occurred from Jan 1<sup>st</sup> to Feb 19<sup>th</sup>, 2020, which were matched with same  
94 data in the previous year according to lunar dates for a direct comparison. Also, we obtained the  
95 proportion of the daily outflow index from Hubei to other provincial areas and 51 cities which  
96 provided detailed exposure history for the confirmed cases from Jan 10<sup>th</sup> (the start of the Lunar New  
97 Year travel rush) to Jan 26<sup>th</sup>, 2020 (lockdown of major cities in Hubei).

98

### 99 **DAILY GROWTH RATE OF SECONDARY CASES**

100 Confirmed cases were categorized into two groups, the primary (with clear history of staying or  
101 traveling in Hubei province within one incubation period) and secondary (those not known to be  
102 primary) cases, by two independent researchers in a blinded manner. The daily growth rate of

103 secondary cases was calculated as new secondary daily cases divided by the cumulative number of  
104 the day before. The lag time between primary and secondary cases was identified by using the  
105 displacement with the highest correlation from the cross-correlation result.

106

## 107 **STATISTICAL ANALYSIS**

108 The daily inflow index of certain provinces and cities was calculated by multiplying the daily outflow  
109 index within Hubei and the corresponding proportion. We defined the total inflow index as the sum  
110 of daily inflow index from Jan 10<sup>th</sup> to 26<sup>th</sup>, 2020. We used principal components analysis to reduce  
111 the dimensionality of five initial parameters of medical resources, and to further obtain the synthetic  
112 score of these parameters<sup>19</sup>. Factor loadings for concordance and overall satisfaction were low and  
113 thus were removed. Table 2 shows 4 item factor loadings for the final two-factor solution, which  
114 explained 96% of the variance. Medical resource scores equal to  $comp1 * proportion1$  plus  
115  $comp2 * proportion2$  (Table S2).

116 The correlations between the number of total confirmed or primary cases and total inflow index at  
117 provincial or city scale, between the medical resources score and fatality or cure rates, and between  
118 the employees in centers for disease control and prevention (CDC) per capita and the confirmed cases  
119 or the incidence of COVID-19 were analyzed using Spearman's correlation analysis. Cross-  
120 correlation of primary and secondary cases was calculated by Pearson's correlation analysis. Principal  
121 components analysis was performed on Stata 14.0, and other data were analyzed using Prism  
122 GraphPad 8.0. Statistical significance was set at  $p < 0.05$ .

123

## 124 **Results**

### 125 **Time trend of COVID-19 epidemics in China**

126 As of Feb 19<sup>th</sup>, 2020, a total of 74,675 confirmed COVID-19 cases had been reported in China, with  
127 83.1% (62,031) being in Hubei province (Fig. 1A). The cumulative number of confirmed cases was  
128 below 1,000 before Jan 23<sup>rd</sup>, 2020, and increased by almost ten-fold by Jan 30<sup>th</sup>, 2020. There was a  
129 further three-fold increase in the number of confirmed cases by Feb 6<sup>th</sup>, 2020, which continues to  
130 grow until now, but at much slow pace. In Hubei province the number of daily confirmed cases  
131 reached peak on Feb 4<sup>th</sup>, 2020 (Fig. 1B), while in other regions, it reached a plateau on Jan 30<sup>th</sup>, 2020,

132 and started to decline from Feb 3<sup>rd</sup>, 2020 (Fig. 1C).

133 As of Feb 19<sup>th</sup>, 2020, the overall case fatality rate was 2.84%, much higher in Hubei province than in  
134 other regions (3.27% vs 0.73%), with Hubei accounted for 95.7% (2029/2121) of total deaths  
135 nationwide. There was irregularity in the reported daily number of deaths over time, with a sudden  
136 rise on Feb 12<sup>th</sup>, 2020, coinciding with change of diagnostic criteria (Fig. 1D). The daily number of  
137 cured cases has continuously increased both in Hubei province and in other parts of China (Fig. 1E).  
138 Following the first confirmed COVID-19 case outside of China in Thailand, as of Feb 19<sup>th</sup>, 2020, a  
139 total of 924 cases have been reported worldwide excluding China (Fig. 1F). However, the daily  
140 cumulative confirmed cases worldwide excluding China grew slowly (Fig. 1G).

### 141 142 **Correlation of population movement with the COVID-19 epidemic**

143 In both 2019 and 2020, the daily population outflow from Hubei started to rise steadily for 7-10 days  
144 before the Lunar New Year's Day (Jan 25<sup>th</sup>, 2020) (Fig. 2A). However, starting on Jan 20<sup>th</sup>, 2020,  
145 there was a sudden surge in the outflow index when it was acknowledged publicly by the government  
146 the fact of human-to-human transmission. In contrast, there has been a dramatic decrease in the  
147 outflow index since Jan 26<sup>th</sup>, 2020, compared with that of 2019, following the total lockdown of most  
148 cities, first in Wuhan and then elsewhere, in Hubei province (Fig. 2A).

149 We correlated the daily inflow index of 30 provincial areas and 51 cities in 18 of these provinces with  
150 the number of reported total or primary cases in the same areas and found a very strong correlation  
151 both at province and city levels. The index of population inflow from Hubei province strongly  
152 positively correlated with number of confirmed total (Provincial scale:  $r=0.9159$ ,  $p<0.001$ , Fig. 2B;  
153 City scale:  $r= 0.6311$ ,  $p<0.001$ , Figure 2D) and primary cases (Provincial  $r= 0.8702$ ,  $p<0.001$ , Fig.  
154 2C; City  $r= 0.6358$ ,  $p<0.001$ , Fig. 2E).

### 155 156 **Growth rate of secondary case across different regions and cities**

157 Overall, the ratio of secondary to primary cases (S/P ratio), a simple index for measuring the growth  
158 of an epidemic, varied greatly across different provincial areas (Fig. 3A), with Heilongjiang (10.7)  
159 and Hong Kong (5.5) being the highest, and Tibet (0) and Qinghai (0.2) being the lowest. However,  
160 there was little correlation between total number of confirmed cases and S/P ratio. For example,

161 Guangdong had the largest number of confirmed cases (1,332) but very low S/P ratio (0.35).

162 Fig. 3B shows the heat map of the daily growth rate of secondary cases from Jan 26<sup>th</sup> to Feb 19<sup>th</sup>,  
163 2020 in different provinces. We found although daily growth rate varied among different provincial  
164 areas, some of them had common characteristics (Fig. 3B). Based on the daily growth rate of  
165 secondary cases we further divided study regions into three categories. In the first group the maximum  
166 values for daily growth rates were all <1.5, including Beijing, Guangdong, and Chongqing (Fig. 3C).  
167 Second category of provinces/cities (eg, Sichuan, Hebei, and Zhejiang) showed much higher growth  
168 rate in the first few days, from Jan 26<sup>th</sup> to 30<sup>th</sup>, 2020, followed by a downward trend until reaching  
169 that of the first category (Fig. 3D). In the last category (eg, Heilongjiang and Tianjin) the daily growth  
170 rate showed a sustained and rapid rise, especially during the 5 days after Jan 30<sup>th</sup>, 2020 (Fig. 3E).

171 We further examined the lag time, or displacement, between primary and secondary cases by area,  
172 which could reflect the time delay in implementing effective local containment measures. Although  
173 the lag time varied across different areas, most appeared to be about 1 week (Fig. 3F), with exceptions  
174 such as Jiangsu, Henan, Tianjin, and Heilongjiang. In Jiangsu province (631 confirmed cases) and  
175 Henan province (1265 confirmed cases), the lag time was only about 4 and 5 days, respectively; while  
176 in Heilongjiang (476 confirmed cases) and Tianjin (130 confirmed cases) it was approximately 13  
177 and 17 days, respectively.

178

### 179 **Correlation of prognosis and transmissibility of COVID-19 with medical resources**

180 Table S3 shows the summarized data of the numbers of CDC employees and severity of local  
181 epidemic. Overall the provinces with higher number of CDC employees per 1,000 population tended  
182 to have fewer confirmed cases ( $r = -0.6295$ ,  $p < 0.001$ , Fig. 4A) and lower infection rate ( $r = -0.4912$ ,  
183  $p < 0.01$ , Fig. 4B). Moreover, in the principal components analysis of the correlation between the  
184 capacity of medical resources and the trends of fatality and cure rates, we found that the cities with  
185 limited medical resources tended to have higher case fatality ( $r = -0.4791$ ,  $p < 0.01$ , Fig. 4C) and lower  
186 cure rates ( $r = 0.5286$ ,  $p < 0.01$ , Fig. 4D).

187

## 188 **DISCUSSION**

189 This study presented detailed analyses of time trends of COVID-19 epidemic across different parts

190 of China and their associations with population movement, public health emergency measures, and  
191 medical resources. We showed that the rapid spread of the COVID-19 epidemic across China was  
192 strongly associated with the mass population movement out of Hubei province, particularly Wuhan  
193 city, before the Chinese Lunar New year, which was subsequently disrupted effectively by the total  
194 lockdown of Wuhan and other cities in Hubei provinces. Although there were variations in the pace  
195 of control across different regions of China, the epidemic outside of Hubei province was contained  
196 rapidly and effectively through various public health emergency measures. As well as public health  
197 measures, local capacity including the number of public health staff and available medical resources  
198 also played important roles in control of epidemic and improved prognosis of affected individuals.

199 The first case of novel COVID-19 infection was reported during early December 2019 and it was not  
200 publicly acknowledged until 20 January 2020 that the virus could be transmitted from human to  
201 human, which triggered rapid and drastic public health measures both in Hubei and rest of China to  
202 try to contain the spread of virus. The total lockdown of Wuhan city on 23<sup>rd</sup> January 2020, followed  
203 by other cities in Hubei a few days later, appeared too late to prevent the epidemic from spreading  
204 into other regions of China, for by then over 5 million people had already left Wuhan. However,  
205 without such drastic measures, the situation could be much worse. The data from Baidu Migration  
206 Map showed that mass population movements out of Wuhan and Hubei province took place not only  
207 before but throughout the whole of Chinese Lunar New Year period. Based on comparison with 2019  
208 data, without lockdown an additional 15 million people could have traveled from Wuhan to other  
209 regions (and overseas) plus similar or even larger number who would have travelled from other  
210 regions to Wuhan. Moreover, there would have been massive internal population movement within  
211 Wuhan and other cities in Hubei during the same period, further exacerbating the epidemic.

212 Expectedly the severity of COVID-19 epidemic outside of Hubei province, especially during the  
213 initial phase, was strongly related to the scale of inward population movements from Wuhan.  
214 However, the epidemic was rapidly brought under control in most areas by introduction of various  
215 public health emergency measures, as demonstrated by decrease of the daily number of confirmed  
216 cases starting from the 1<sup>st</sup> or 2<sup>nd</sup> week of February and the lack of clear correlation between S/P ratio  
217 and number of total confirmed cases. Despite this, the pace with which the epidemic was contained  
218 varied across different areas as assessed by various parameters examined, including S/P ratio, the  
219 daily growth rate of secondary cases and lag time. For example, in Guangdong and Beijing, both of



220 which were badly affected by SARS outbreak in 2003, the epidemic was effectively contained at very  
221 early stage, suggesting adequate level of local preparedness and experience in dealing with such  
222 epidemics. Similarly, in Zhejiang province, doctors can pre-screen suspected patient through the  
223 internet application, which greatly reduce the probability of hospital transmission. Moreover, using  
224 cloud computing facilities and integrated big data platform, public health doctors in Zhejiang  
225 province was also able to cross-examine every suspected case. These measures have contributed  
226 importantly to a sharp and continual downward trend in the number infected after Jan 30<sup>th</sup>, 2020. On  
227 the other hand, in several other areas (eg, Heilongjiang and Tianjin) there were prolonged delays in  
228 containing the epidemic, reflecting probably less effective local measures in controlling the epidemic.  
229 For example, in Heilongjiang, the S/P ratio approached 11, which was the highest across all regions  
230 outside of Hubei, suggesting nearly 90 percent of the confirmed cases resulted from family gatherings.

231 The regional variations in the pace of epidemic containment was also evident by comparison of the  
232 mean lag time between primary and secondary cases. Overall the mean lag time was about 1 week,  
233 with particularly low value in Jiangsu (~ 4 days) and Henan (~5 days), and particularly high value in  
234 Heilongjiang (~13 days) and Tianjin (~17 days). Henan is a neighboring province of Hubei with a  
235 total population of 100 million people and extensive transport connections with Wuhan. In  
236 recognition of forthcoming epidemic, the Henan provincial government introduced strong measures  
237 to greatly reduce and restrict public transport from Wuhan areas into Henan even before the total  
238 lockdown of the Wuhan city.

239 Although the COVID-19 shared many similar epidemiological features to those of SARS in 2003<sup>16</sup>,  
240 it appeared to be much less deadly<sup>20,21</sup>, with the overall case fatality rate of less than 3% as opposed  
241 to ~10% for SARS. However, there was great difference in the case fatality rates between Hubei,  
242 particularly Wuhan and rest of the China. As the epicenter of COVID-19 outbreak, medical and health  
243 services in Hubei Province were overwhelmed and ill prepared for such a rapid and substantial  
244 increase in the number of infected cases, leading to poor and inadequate management of patients,  
245 hence poor prognosis. Apart from difference in the capacity of medical services, other factors,  
246 including age of people affected and proportion with other comorbidities may also contribute to the  
247 higher case fatality observed in Wuhan and Hubei. However, without detailed clinical data from  
248 individual patients, we were not able to examine these issues directly. It is also possible that a large  
249 number of minor cases were not promptly detected or diagnosed in Wuhan and Hubei, resulting in

250 higher case-fatality rate. Indeed, as the medical service started to improve gradually and large number  
251 of cases were properly diagnosed the case fatality rates had started to decreased steadily over the last  
252 two weeks. Outside of Hubei, although the case fatality rates were very low, we also found a  
253 significant correlation between health scores and overall prognosis of patients. In recognizing the  
254 burden of epidemic in Hubei province and need for providing prompt and adequate medical service  
255 to those infected, the Chinese government has created a “province to city” support system, in which  
256 each city in Hubei province received direct and targeted support from at least one appointed province.

257 In summary the present study showed that the spread of the COVID-19 epidemic in China (and  
258 elsewhere in other countries) could be attributed primarily to the mass population movement from  
259 Hubei prior to the Chinese Lunar New Year. Subsequently, effective governmental health emergency  
260 measures introduced both in Hubei and elsewhere have played important roles in rapid and effective  
261 control of the epidemic in China. Although many other unmeasured factors, such as local climates  
262 and characteristic of individuals affected, may explain part of our findings, the present study also  
263 provided good evidence that adequate levels of investments in public health (eg, number of public  
264 health staff) and medical resources can lead to improved control of epidemic and better prognosis of  
265 the infected individuals. Despite the rapid improvement, the COVID-19 epidemic in China and  
266 elsewhere is not yet over and vigorous public health measures are still warranted in order to totally  
267 eliminate the epidemic.

268

269 **FOOTNOTES**

270 Partially supported by the Zhejiang University Special Scientific Research Fund for COVID-19 Prevention and  
271 Control.

272

273 **APPENDIX**

274 The authors' affiliations are as follows: the Key Laboratory of Respiratory Disease of Zhejiang Province,  
275 Department of Respiratory and Critical Care Medicine, Second Affiliated Hospital of Zhejiang University School  
276 of Medicine (S.Y., F.L., X.G., Z.L., X.D., H.C., S.C., M.Z., Z.S., Y.W., M.Z.S., F.Y., L.C., B.Z., J.L., S.W., W.L.,  
277 Z.C., H.S.), and the Hangzhou Mitigenomics Technology Inc. (YS) – all in China, and the Clinical Trial Service  
278 Unit & Epidemiological Studies Unit, Nuffield Department of Population Health, University of Oxford, United  
279 Kingdom (CZ).

280

## 281 REFERENCES

- 282 1. Li Q, Guan X, Wu P, et al. Early Transmission Dynamics in Wuhan, China, of Novel Coronavirus-Infected  
283 Pneumonia. *N Engl J Med* 2020.
- 284 2. Wang C, Horby PW, Hayden FG, Gao GF. A novel coronavirus outbreak of global health concern. *Lancet* 2020;  
285 **395**(10223): 470-3.
- 286 3. Lu R, Zhao X, Li J, et al. Genomic characterisation and epidemiology of 2019 novel coronavirus: implications  
287 for virus origins and receptor binding. *Lancet* 2020.
- 288 4. Zhou P, Yang XL, Wang XG, et al. A pneumonia outbreak associated with a new coronavirus of probable bat  
289 origin. *Nature* 2020.
- 290 5. WHO. Novel Coronavirus(2019-nCoV): Situation Report – 22. 2020.
- 291 6. ICTV. The Coronavirus Study Group (CSG) of International Committee on Taxonomy of Viruses (ICTV)  
292 announced the new name SARS-CoV-2 for 2019-nCoV.
- 293 7. Mahallawi WH, Khabour OF, Zhang Q, Makhdoum HM, Suliman BA. MERS-CoV infection in humans is  
294 associated with a pro-inflammatory Th1 and Th17 cytokine profile. *Cytokine* 2018; **104**: 8-13.
- 295 8. Wong CK, Lam CW, Wu AK, et al. Plasma inflammatory cytokines and chemokines in severe acute respiratory  
296 syndrome. *Clin Exp Immunol* 2004; **136**(1): 95-103.
- 297 9. Zhe Xu LS, Yijin Wang, Jiyuan Zhang, Lei Huang, Chao Zhang, et al. Pathological findings of COVID-19  
298 associated with acute respiratory distress syndrome. *The Lancet Respiratory Medicine* 2020.
- 299 10. Chan JF, Yuan S, Kok KH, et al. A familial cluster of pneumonia associated with the 2019 novel coronavirus  
300 indicating person-to-person transmission: a study of a family cluster. *Lancet* 2020; **395**(10223): 514-23.
- 301 11. Wu JT, Leung K, Leung GM. Nowcasting and forecasting the potential domestic and international spread of  
302 the 2019-nCoV outbreak originating in Wuhan, China: a modelling study. *Lancet* 2020.
- 303 12. Commission BCNH. Genomic characterisation and epidemiology of 2019 novel coronavirus: implications for  
304 virus origins and receptor binding (No 1). 2020. [http://www.gov.cn/xinwen/2020-01/23/content\\_5471751.htm](http://www.gov.cn/xinwen/2020-01/23/content_5471751.htm)  
305 (accessed January 23, 2020).
- 306 13. Chinadaily. 5 million-plus leave Wuhan: Mayor.  
307 <https://www.chinadaily.com.cn/a/202001/27/WS5e2dcd01a310128217273551.html> (accessed Jan 27 2020).
- 308 14. Ai S, Zhu G, Tian F, et al. Population movement, city closure and spatial transmission of the 2019-nCoV  
309 infection in China. *medRxiv* 2020.
- 310 15. WHO. Statement on the second meeting of the International Health Regulations (2005) Emergency  
311 Committee regarding the outbreak of novel coronavirus (2019-nCoV). Jan 30. [https://www.who.int/news-  
312 room/detail/30-01-2020-statement-on-the-second-meeting-of-the-international-health-regulations-\(2005\)-  
313 emergency-committee-regarding-the-outbreak-of-novel-coronavirus-\(2019-ncov\)](https://www.who.int/news-room/detail/30-01-2020-statement-on-the-second-meeting-of-the-international-health-regulations-(2005)-emergency-committee-regarding-the-outbreak-of-novel-coronavirus-(2019-ncov)) (accessed Jan 30 2020).
- 314 16. Chen N, Zhou M, Dong X, et al. Epidemiological and clinical characteristics of 99 cases of 2019 novel  
315 coronavirus pneumonia in Wuhan, China: a descriptive study. *Lancet* 2020; **395**(10223): 507-13.
- 316 17. Wang D, Hu B, Hu C, et al. Clinical Characteristics of 138 Hospitalized Patients With 2019 Novel Coronavirus-  
317 Infected Pneumonia in Wuhan, China. *JAMA* 2020.
- 318 18. Huang C, Wang Y, Li X, et al. Clinical features of patients infected with 2019 novel coronavirus in Wuhan,  
319 China. *Lancet* 2020; **395**(10223): 497-506.
- 320 19. Chiu YH, Bellavia A, James-Todd T, et al. Evaluating effects of prenatal exposure to phthalate mixtures on  
321 birth weight: A comparison of three statistical approaches. *Environ Int* 2018; **113**: 231-9.
- 322 20. Yin YD, Wunderink RG. MERS, SARS and other coronaviruses as causes of pneumonia. *Respirology* 2018;  
323 **23**(2): 130-7.
- 324 21. Heymann DL, Shindo N. COVID-19: what is next for public health? *The Lancet* 2020.

327 **FIGURE LEGENDS**

328 **Figure 1. Epidemiological Features of COVID-19 in Hubei, China, and Worldwide**

329 (A) The spatial distribution of 74675 cases with confirmed COVID-19 infection on Feb19<sup>th</sup>, 2020 in  
330 China. The color of regions represents the number of confirmed cases. Magnified image shows the  
331 spatial distribution of 62031 confirmed cases in cities and regions of Hubei province. (B-C) Time  
332 course of the newly confirmed COVID-19 cases in Hubei province (B) and in China excluding Hubei  
333 (C). (D-E) Daily number of death (D) and cure (E) of COVID-19 patients in Hubei province and in  
334 China excluding Hubei. (F) Global distribution of countries, territories, or areas with confirmed  
335 COVID-19 patients Feb19<sup>th</sup>, 2020. (G) Time course of cumulative confirmed COVID-19 cases  
336 (n=924) worldwide excluding China.

337

338 **Figure 2. Associations of Population Movement with the COVID-19 Prevalence in Other**  
339 **Chinese Areas**

340 (A) Outflow index of Hubei province during period of Jan 1<sup>st</sup> to Feb 19<sup>th</sup> in 2019 and 2020; (B-E)  
341 The correlations between the total number of or primary confirmed COVID-19 cases and the total  
342 index of inflow at the provincial (B, C) and city (D, E) scale.

343

344 **Figure 3. Secondary Case Growth Rate and Lag Time in other Chinese Regions**

345 (A) Cumulative number of confirmed cases and ratio of secondary to primary cases (S/P ratio) in  
346 provinces/cities/region by Feb 19<sup>th</sup>, 2020. (B) Daily growth rate of secondary cases in  
347 provinces/cities/regions from Jan 26<sup>th</sup> to Feb 19<sup>th</sup>, 2020. (C-E) Three types of provincial  
348 administrative areas depending on variety of daily growth rate of secondary cases. (F) Lag time  
349 between primary and secondary cases in various provinces and examples of Jiangsu (~ 4 days) and  
350 Tianjin (~ 17 days) from Jan 26<sup>th</sup> to Feb 19<sup>th</sup>, 2020.

351

352 **Figure 4. Correlations between the Abundance of Medical Resources and Disease Prognosis.**

353 (A, B) The correlations between confirmed cases (A) or incidence (B) and CDC employees per 1000  
354 persons of provinces in China (excluding Hubei and Tibet). (C, D) Correlations between the medical  
355 resources scores and the fatality (C) or the cure rate (D) of certain Chinese cities.

356

# Figure 1

**A**

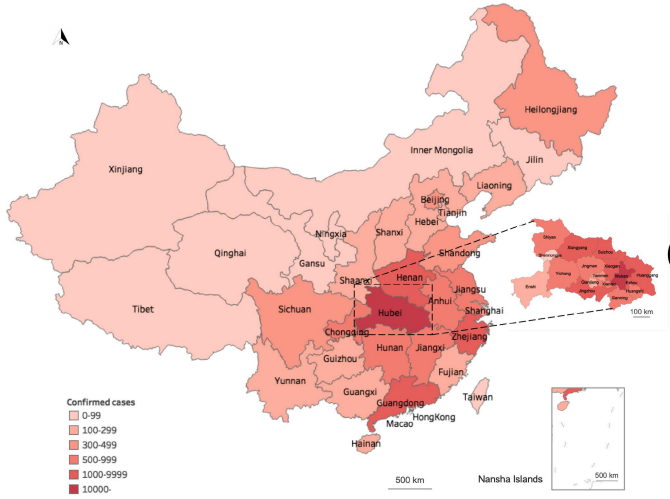

**B**

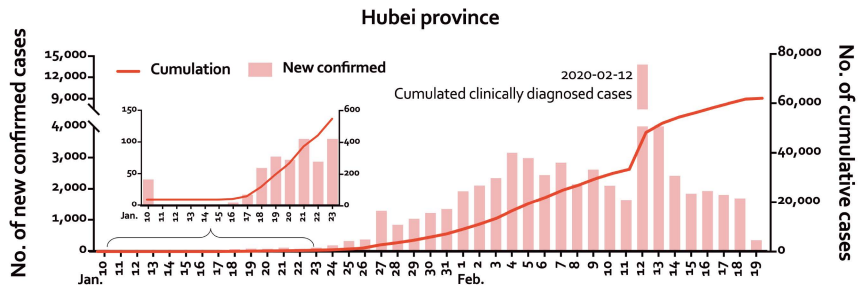

**C**

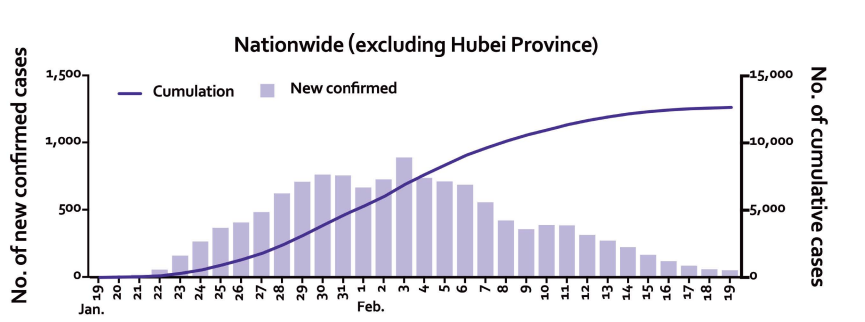

**D**

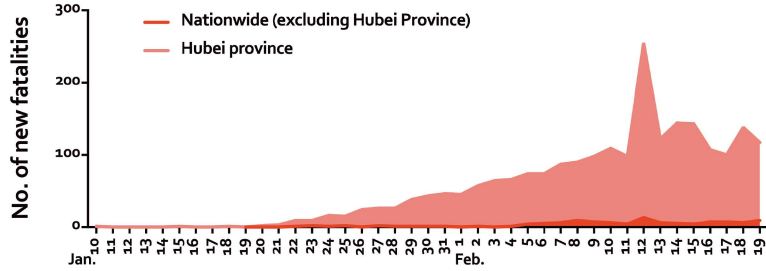

**E**

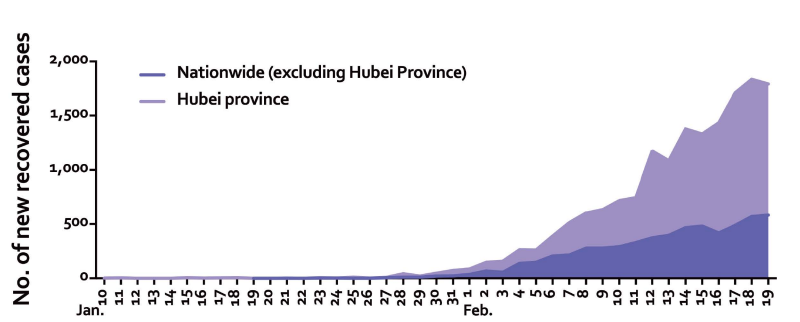

**F**

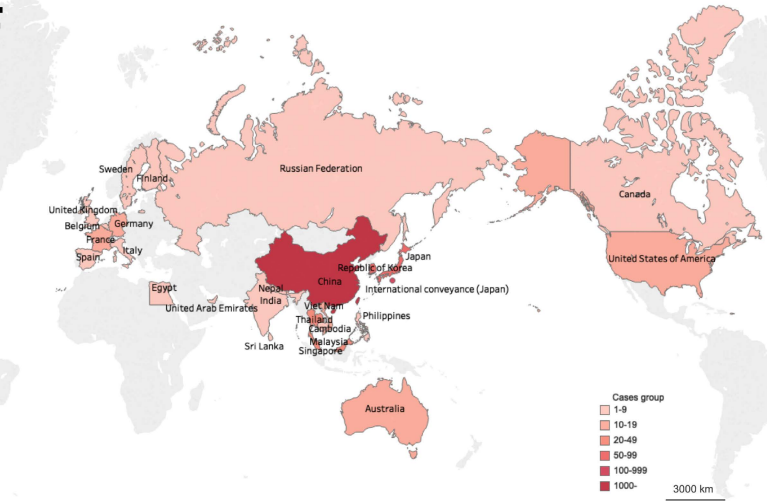

**G**

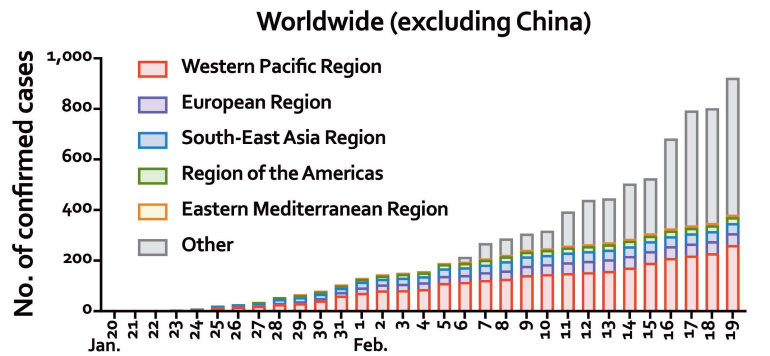

# Figure 2

## A

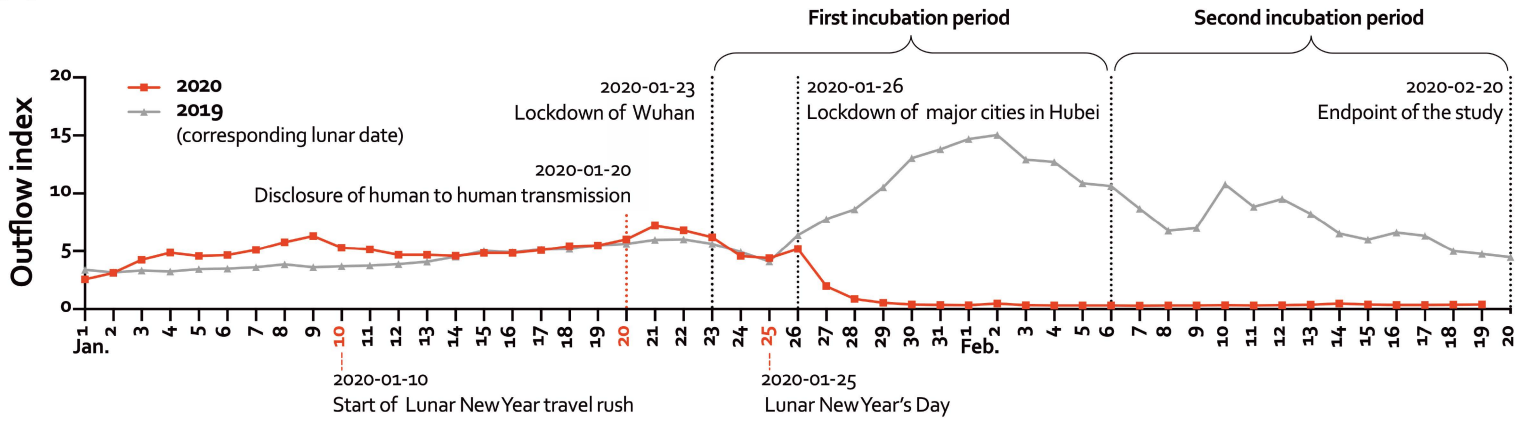

## B

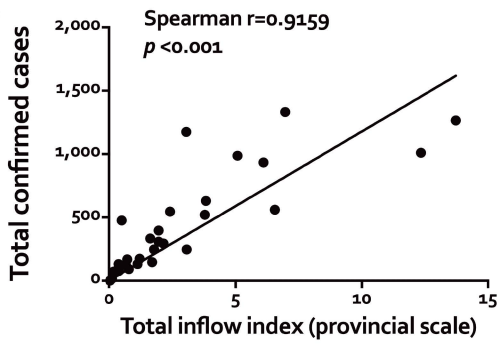

## C

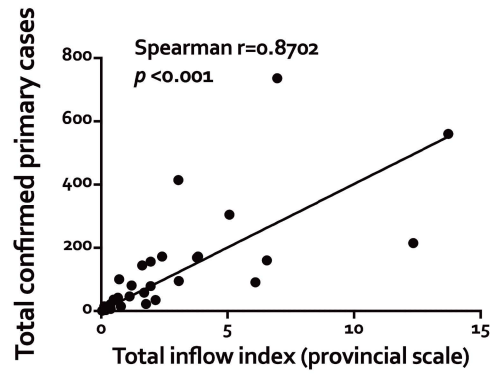

## D

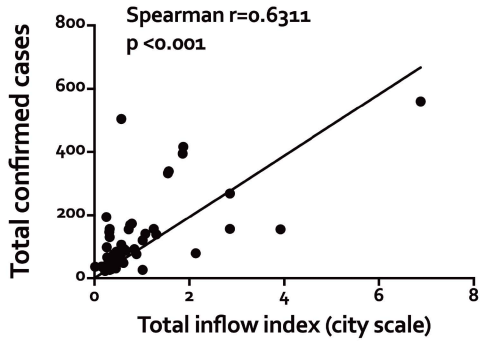

## E

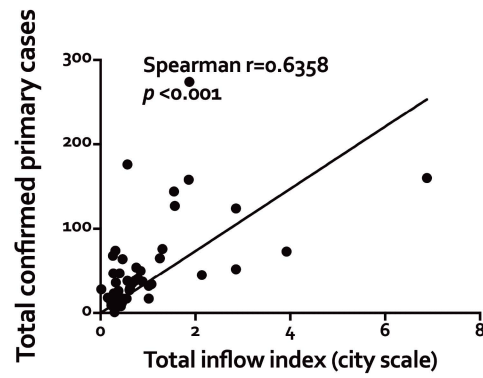

# Figure 3

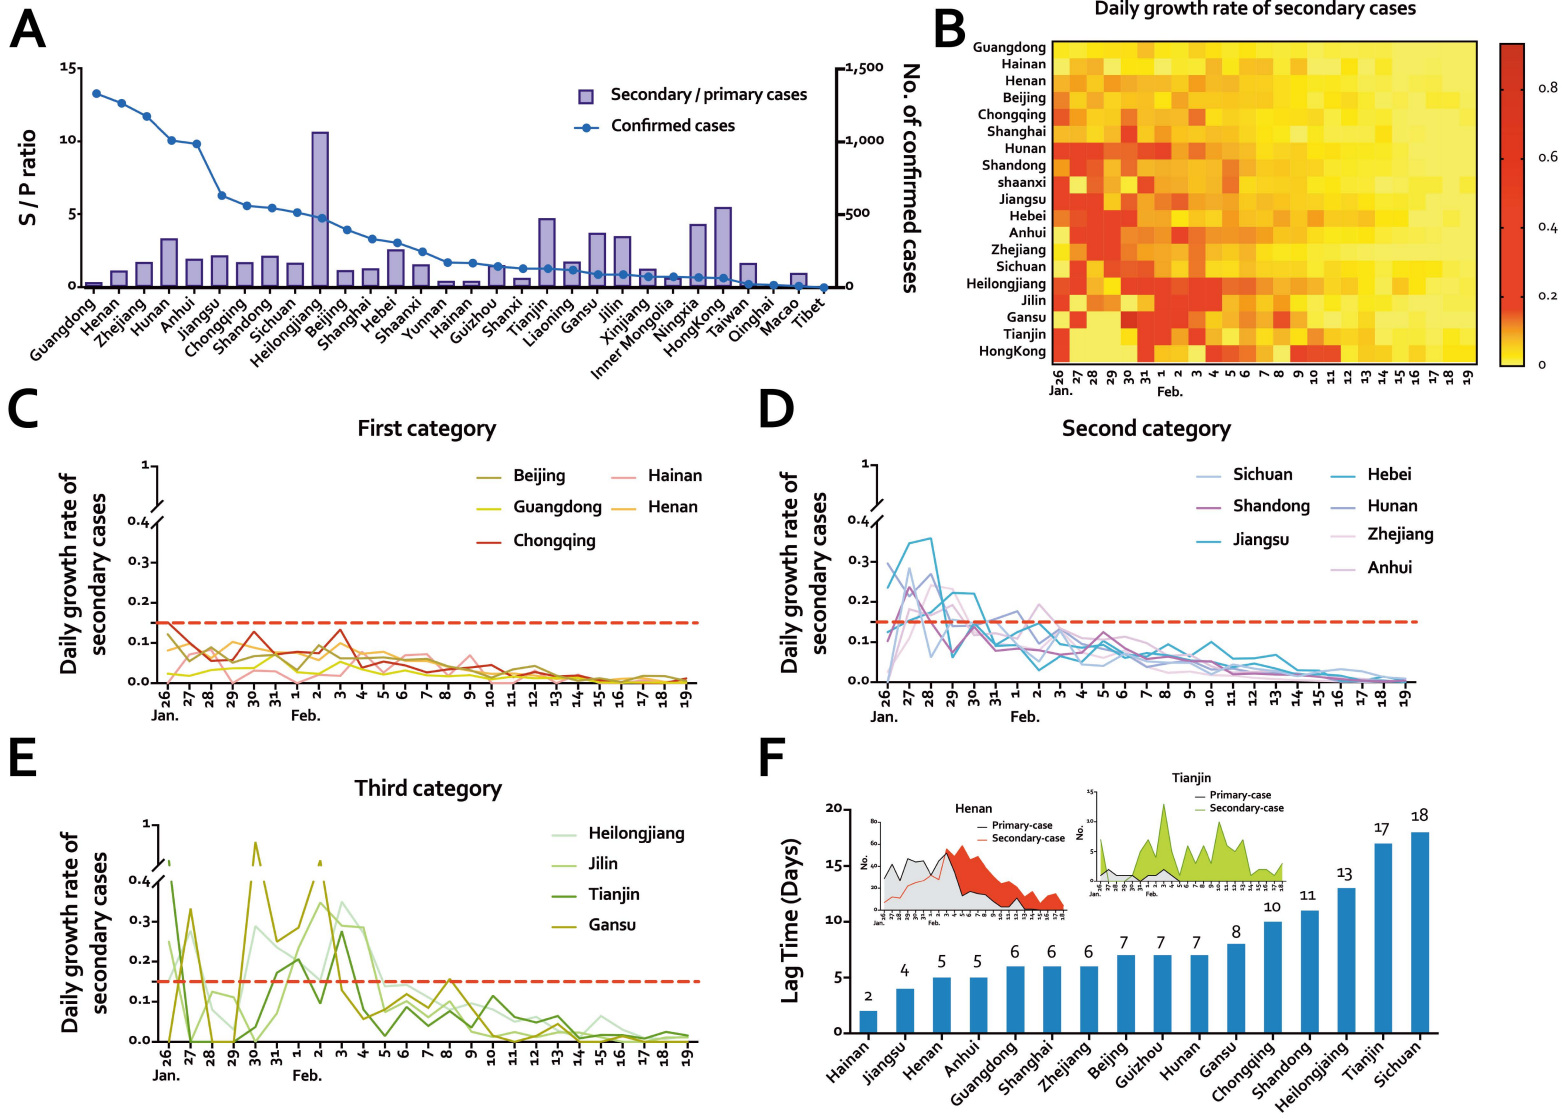



# Figure 4

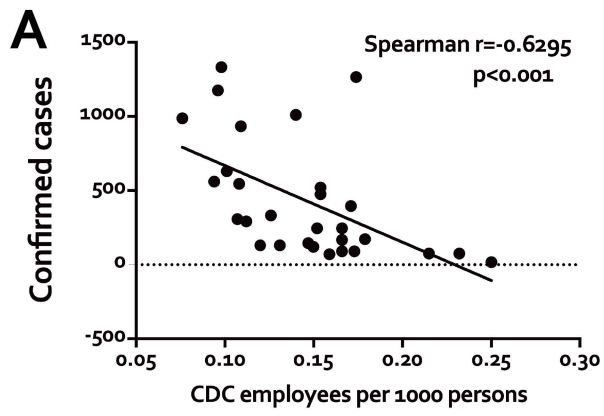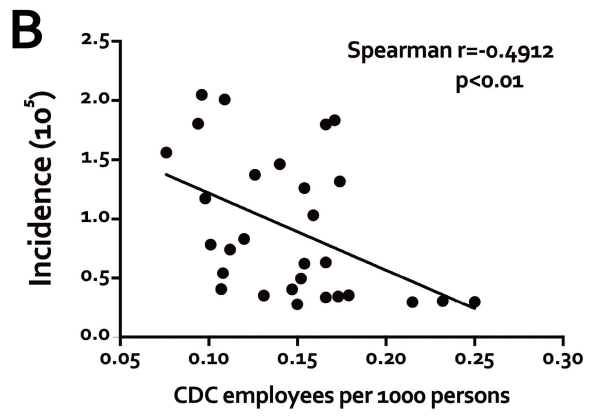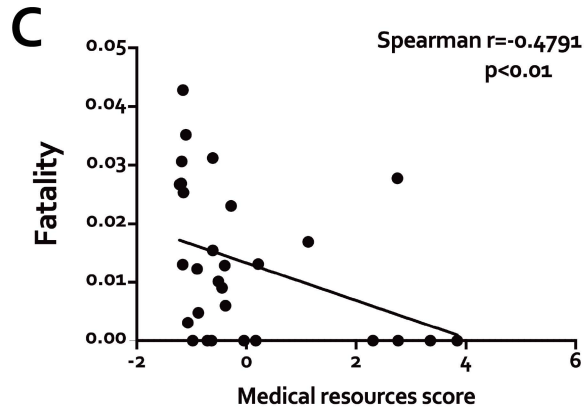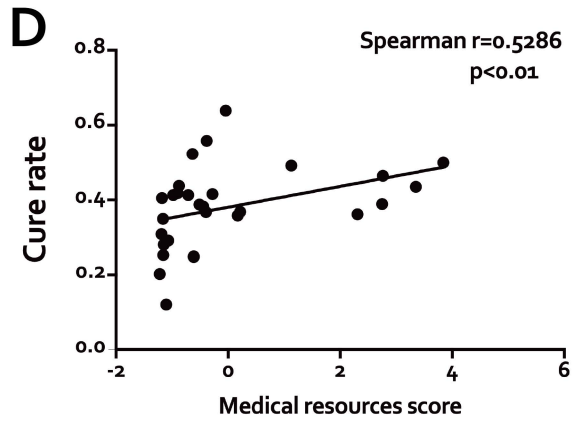

Table S1. Indexes of Health Resources for Included Cities

| City       | Hospitals per<br>1000 persons | Health<br>workers per<br>1000 persons | Beds per<br>1000 persons | Health<br>expenditure<br>per capita | Population<br>(1000 persons) | Confirmed<br>cases | Fatality | Cure rate |
|------------|-------------------------------|---------------------------------------|--------------------------|-------------------------------------|------------------------------|--------------------|----------|-----------|
| *Wuhan     | 0.036                         | 12.30                                 | 8.60                     | 3522                                | 11081                        | 45027              | 3.52%    | 12.10%    |
| *Xiaogan   | 0.012                         | 4.92                                  | 4.63                     | 2066                                | 4920                         | 3329               | 2.67%    | 20.22%    |
| *Huanggang | 0.011                         | 5.30                                  | 5.68                     | 2403                                | 6330                         | 2839               | 3.06%    | 40.47%    |
| *Huangshi  | 0.015                         | 7.72                                  | 6.36                     | 2890                                | 2470.7                       | 967                | 2.69%    | 30.92%    |
| *Jingmen   | 0.021                         | 7.41                                  | 5.82                     | 3244                                | 2896.5                       | 794                | 4.28%    | 25.31%    |
| *Xianning  | 0.013                         | 8.68                                  | 5.76                     | 1298                                | 2543.3                       | 766                | 1.31%    | 34.99%    |
| *Tianmen   | 0.012                         | 6.47                                  | 4.76                     | 515                                 | 1273.5                       | 473                | 2.54%    | 28.12%    |
| *Shiyan    | 0.018                         | 8.31                                  | 8.73                     | 1974                                | 3406                         | 641                | 0.31%    | 29.17%    |
| *Enshi     | 0.011                         | 5.44                                  | 5.97                     | 978                                 | 4020.4                       | 244                | 1.23%    | 41.80%    |

|           |       |       |       |          |         |     |       |        |
|-----------|-------|-------|-------|----------|---------|-----|-------|--------|
| Wenzhou   | 0.016 | 7.21  | 4.59  | 2711     | 9250    | 504 | 0.00% | 41.27% |
| Shenzhen  | 0.011 | 8.82  | 3.65  | 1465.45  | 13020   | 416 | 0.48% | 43.75% |
| Chongqing | 0.026 | 8.79  | 7.10  | 3836.11  | 31017.9 | 552 | 0.91% | 38.22% |
| Shanghai  | 0.015 | 8.52  | 10.10 | 8630.3   | 24240   | 333 | 0.60% | 55.86% |
| Beijing   | 0.034 | 16.33 | 5.73  | 10106.42 | 21542   | 395 | 1.01% | 38.73% |
| Fuyang    | 0.015 | 5.04  | 4.10  | 1688.7   | 8207    | 155 | 0.00% | 41.29% |
| Xinyu     | 0.014 | 7.81  | 5.00  | 2094.23  | 1160.8  | 130 | 0.00% | 52.31% |
| Harbin    | 0.029 | 8.15  | 8.57  | 3154.5   | 1085.8  | 194 | 1.55% | 24.74% |
| Bengbu    | 0.034 | 7.27  | 5.40  | 1774     | 3392    | 160 | 3.13% | 25.00% |
| Ganzhou   | 0.050 | 5.28  | 4.89  | 1551.05  | 8507.5  | 76  | 1.32% | 36.84% |
| Nanyang   | 0.052 | 7.93  | 4.70  | 2174.6   | 10013.6 | 155 | 1.29% | 36.77% |
| Hangzhou  | 0.032 | 14.69 | 10.49 | 2929     | 9806    | 169 | 0.00% | 63.91% |
| Xi'an     | 0.035 | 14.07 | 7.77  | 2048.8   | 10003.7 | 120 | 0.00% | 35.83% |

|              |       |       |      |         |         |     |       |        |
|--------------|-------|-------|------|---------|---------|-----|-------|--------|
| Qingdao      | 0.045 | 8.94  | 6.82 | 794     | 9394.8  | 59  | 1.69% | 49.15% |
| Jinan        | 0.033 | 13.98 | 8.76 | 1513.5  | 7460.4  | 47  | 0.00% | 36.17% |
| Shijiazhuang | 0.023 | 9.61  | 5.54 | 1122.88 | 10951.6 | 28  | 0.00% | 46.43% |
| Guiyang      | 0.039 | 10.13 | 7.73 | 2706.47 | 4881.9  | 36  | 2.78% | 38.89% |
| Bijie        | 0.041 | 4.86  | 5.70 | 1526.23 | 6686.1  | 23  | 0.00% | 43.48% |
| Zunyi        | 0.066 | 9.67  | 7.80 | 3100    | 6270.7  | 32  | 0.00% | 50.00% |
| Tianjin      | 0.037 | 6.48  | 4.38 | 5554.36 | 15568.7 | 130 | 2.31% | 41.54% |

---

\*Cites of Hubei Province

Table S2. The Results of Principal Component Analysis (PCA)

| Variable                                  | Component 1 | Component 2 | Component 3 | Component 4 |
|-------------------------------------------|-------------|-------------|-------------|-------------|
| Hospitals per 1,000 persons per case      | 0.485       | 0.015       | 0.757       | 0.436       |
| Health workers per 1,000 persons per case | 0.491       | 0.056       | -0.649      | 0.570       |
| Beds per 1,000 persons per case           | 0.510       | 0.022       | -0.047      | -0.487      |
| Health expenditure per capita             | 0.510       | 0.022       | -0.047      | -0.487      |
| Population                                | -0.057      | 0.998       | 0.027       | -0.018      |
| Eigenvalue                                | 3.820       | 0.992       | 0.167       | 0.021       |
| % Variance Proportion                     | 76.41       | 19.83       | 3.34        | 0.42        |

Table S3. The Incidence of COVID-19 and CDC Employees per 1,000 Persons in Different Provinces

| City           | Population<br>(10000 persons) | No. of CDC employees<br>per 1000 persons | No. of confirmed<br>cases | Incidence<br>(/10 <sup>5</sup> ) |
|----------------|-------------------------------|------------------------------------------|---------------------------|----------------------------------|
| Qinghai        | 603                           | 0.250                                    | 18                        | 0.299                            |
| Xinjiang       | 2487                          | 0.232                                    | 76                        | 0.306                            |
| Inner Mongolia | 2534                          | 0.215                                    | 75                        | 0.296                            |
| Yunnan         | 4830                          | 0.179                                    | 172                       | 0.356                            |
| Henan          | 9605                          | 0.174                                    | 1265                      | 1.317                            |
| Gansu          | 2637                          | 0.173                                    | 91                        | 0.345                            |
| Beijing        | 2154                          | 0.171                                    | 395                       | 1.834                            |
| Jilin          | 2704                          | 0.166                                    | 91                        | 0.337                            |
| Hainan         | 934                           | 0.166                                    | 168                       | 1.799                            |
| Shaanxi        | 3864                          | 0.166                                    | 245                       | 0.634                            |

|              |       |       |      |       |
|--------------|-------|-------|------|-------|
| Ningxia      | 688   | 0.159 | 71   | 1.032 |
| Heilongjiang | 3773  | 0.154 | 476  | 1.262 |
| Sichuan      | 8341  | 0.154 | 520  | 0.623 |
| Guangxi      | 4926  | 0.152 | 245  | 0.497 |
| Liaoning     | 4359  | 0.150 | 121  | 0.278 |
| Guizhou      | 3600  | 0.147 | 146  | 0.406 |
| Hunan        | 6899  | 0.140 | 1010 | 1.464 |
| Shanxi       | 3718  | 0.131 | 131  | 0.352 |
| Shanghai     | 2424  | 0.126 | 333  | 1.374 |
| Tianjin      | 1560  | 0.120 | 130  | 0.833 |
| Fujian       | 3941  | 0.112 | 293  | 0.743 |
| Jiangxi      | 4648  | 0.109 | 934  | 2.009 |
| Shandong     | 10047 | 0.108 | 546  | 0.543 |

|           |       |       |      |       |
|-----------|-------|-------|------|-------|
| Hebei     | 7556  | 0.107 | 307  | 0.406 |
| Jiangsu   | 8051  | 0.101 | 631  | 0.784 |
| Guangdong | 11346 | 0.098 | 1332 | 1.174 |
| Zhejiang  | 5737  | 0.096 | 1175 | 2.048 |
| Chongqing | 3102  | 0.094 | 560  | 1.805 |
| Anhui     | 6324  | 0.076 | 987  | 1.561 |

---
